# Supplementary material for: Success and failure of additional immune modulators in steroid-refractory/resistant pneumonitis related to immune checkpoint blockade
Source: PubMed Central journal article supplement — J Immunother Cancer. 2021 Feb 10;9(2):e001884. doi: 10.1136/jitc-2020-001884 (PMC7878154; doi:10.1136/jitc-2020-001884), 2021-02-10
Supplement: jitc-2020-001884supp001.pdf [file jitc-2020-001884supp001.pdf]

| <b>Table S1. Medications Searched in Institutional Database Query</b> |                                     |
|-----------------------------------------------------------------------|-------------------------------------|
| <b>Immune Checkpoint Inhibitors</b>                                   | <b>Additional Immune Modulators</b> |
| Atezolizumab                                                          | Abatacept                           |
| Avelumab                                                              | Adalimumab                          |
| Cemiplimab                                                            | Anakinra                            |
| Durvalumab                                                            | Belatacept                          |
| Ipilimumab                                                            | Certolizumab                        |
| Lirilumab                                                             | Cyclophosphamide                    |
| Mogamulizumab                                                         | Etanercept                          |
| Nivolumab                                                             | Golimumab                           |
| Pembrolizumab                                                         | Immune globulin IV                  |
| Tremelimumab                                                          | Infliximab                          |
| Urelumab                                                              | Mycophenolate mofetil               |
| Varlilumab                                                            | Rituximab                           |
|                                                                       | Tocilizumab                         |
|                                                                       | Vedolizumab                         |

| <b>Table S2. Toxicity of additional immune modulators</b> |                          |                                                 |         |                                                                                                               |
|-----------------------------------------------------------|--------------------------|-------------------------------------------------|---------|---------------------------------------------------------------------------------------------------------------|
|                                                           |                          | <b>Treatment detail</b>                         |         | <b>Toxicity</b>                                                                                               |
| <b>Patient 1</b>                                          | day 18,32                | Infliximab dosed                                | day 59  | <i>P.aeruginosa</i> , <i>S.marcescens</i> pneumonia; died                                                     |
| <b>Patient 2</b>                                          | day 9<br>day 26          | Infliximab dosed<br>Mycophenolate initiated     | day 44  | Febrile neutropenia; <i>P. aeruginosa</i> SBP and sepsis; <i>C. albicans</i> fungemia; treated and discharged |
| <b>Patient 8</b>                                          | day 4,11                 | Infliximab dosed                                | day 14  | Disseminated HSV-1; died                                                                                      |
| <b>Patient 26</b>                                         | day 79-128<br>day 81, 97 | Infliximab dosed (x7)<br>Cyclophosphamide dosed | day 130 | <i>E. faecalis</i> , <i>P. aeruginosa</i> bacteremia; died; Fungal pneumonia on autopsy                       |

Table S3. Individual Patient Characteristics and Outcomes

| Pt No. | Primary malignancy         | Age | Sex | Smok. status | ICI line of therapy | Pulm. history | Prior chest RT | ICI agent(s)          | Biopsy result                                        | CTCAE grade | Steroid failure type | Additional Immune-suppressant | Pneumonitis Response | Toxicity Pneumonitis Treatment | Cause of death |
|--------|----------------------------|-----|-----|--------------|---------------------|---------------|----------------|-----------------------|------------------------------------------------------|-------------|----------------------|-------------------------------|----------------------|--------------------------------|----------------|
| 1      | Melanoma                   | 65  | M   | F            | 1                   | None          | N              | Nivolumab, Ipilimumab | Cellular interstitial pneumonitis, acute lung injury | 2           | Refr.                | Inflix.                       | Transient            | Infection                      | Infection      |
| 2      | Multiple Myeloma           | 60  | M   | F            | 4                   | PE            | N              | Nivolumab, ipilimumab | Chronic pneumonitis, granulomas                      | 3           | Refr.                | Inflix., MMF                  | Durable (resolved)   | Infection                      | POD            |
| 3      | Urothelial bladder cancer  | 75  | M   | F            | 2                   | None          | N              | Pembrolizumab         |                                                      | 4           | Refr.                | Inflix.                       | No response          |                                | Pneumonitis    |
| 4      | NSCLC                      | 66  | F   | F            | 1                   | PE            | N              | Pembrolizumab         |                                                      | 3           | Refr.                | Inflix.                       | Durable              |                                | FTT            |
| 5      | Prostate cancer            | 53  | M   | N            | 4                   | None          | N              | Atezolizumab          | Org. Pna.                                            | 3           | Refr.                | Inflix.                       | Transient            |                                | Pneumonitis    |
| 6      | NSCLC                      | 71  | M   | F            | 3                   | None          | Y              | Durvalumab            |                                                      | 3           | Refr.                | Inflix., MMF                  | Durable (resolved)   |                                | Stroke         |
| 7      | Small cell lung cancer     | 75  | F   | F            | 4                   | None          | Y              | Nivolumab             |                                                      | 4           | Refr.                | Inflix.                       | Transient            |                                | Unknown; POD   |
| 8      | NSCLC                      | 79  | M   | F            | 2                   | PE            | N              | Pembrolizumab         |                                                      | 3           | Refr.                | Inflix.                       | Transient            | Infection                      | Infection      |
| 9      | Squamous esophageal cancer | 70  | M   | F            | 3                   | None          | Y              | Pembrolizumab         |                                                      | 3           | Refr.                | Inflix.                       | No response          |                                | Pneumonitis    |
| 10     | Melanoma                   | 60  | F   | F            | 1                   | None          | N              | Ipilimumab            |                                                      | 3           | Refr.                | Inflix.                       | Transient            |                                | POD            |
| 11     | Melanoma                   | 77  | M   | F            | 1                   | None          | N              | Nivolumab, ipilimumab | DAD                                                  | 3           | Refr.                | Inflix.                       | Transient            |                                | Unknown        |
| 12     | Colorectal                 | 72  | M   | F            | 4                   | P / ILD       | N              | Nivolumab             |                                                      | 3           | Refr.                | Inflix.                       | No response          |                                | Pneumonitis    |
| 13     | NSCLC                      | 59  | F   | F            | 1                   | None          | N              | Pembrolizumab         |                                                      | 2           | Resist.              | MMF                           | Durable              |                                | Stroke, PE     |
| 14     | Head and Neck SCC          | 69  | M   | F            | 2                   | None          | N              | Pembrolizumab         | Cellular interstitial pneumonitis                    | 2           | Resist.              | MMF, Inflix.                  | Durable              |                                |                |

| Pt No. | Primary malignancy             | Age | Sex | Smok. status | ICI line of therapy | Pulm. history | Prior chest RT | ICI agent(s)          | Biopsy result                                        | CTCAE grade | Steroid failure type | Additional Immune-suppressant | Pneumonitis Response | Toxicity Pneumonitis Treatment | Cause of death       |
|--------|--------------------------------|-----|-----|--------------|---------------------|---------------|----------------|-----------------------|------------------------------------------------------|-------------|----------------------|-------------------------------|----------------------|--------------------------------|----------------------|
| 15     | NSCLC                          | 71  | M   | F            | 1                   | C             | N              | Nivolumab, ipilimumab |                                                      | 2           | Resist.              | Inflix.                       | Transient            |                                | FTT                  |
| 16     | Renal Cell Carcinoma           | 56  | M   | N            | 3                   | None          | Y              | Nivolumab, Ipilimumab |                                                      | 2           | Resist.              | MMF                           | Transient            |                                |                      |
| 17     | NSCLC                          | 64  | F   | F            | 2                   | None          | Y              | Pembrolizumab         | Cellular interstitial pneumonitis                    | 2           | Resist.              | Inflix.                       | Durable              |                                |                      |
| 18     | Fibromyxoid sarcoma            | 52  | M   | F            | 2                   | None          | N              | Atezolizumab          | DAD, acute and organizing patterns                   | 2           | Resist.              | Inflix., MMF                  | Durable              |                                | Traumatic fall       |
| 19     | Melanoma                       | 73  | F   | F            | 1                   | None          | N              | Pembrolizumab         |                                                      | 2           | Resist.              | MMF                           | Durable              |                                |                      |
| 20     | NSCLC                          | 68  | F   | F            | 1                   | C             | Y              | Pembrolizumab         |                                                      | 2           | Resist.              | Inflix.                       | Transient            |                                |                      |
| 21     | Renal Cell Carcinoma           | 61  | M   | N            | 3                   | None          | N              | Nivolumab             |                                                      | 2           | Resist.              | MMF                           | Durable              |                                |                      |
| 22     | Renal Cell Carcinoma           | 77  | F   | N            | 2                   | None          | N              | Nivolumab             |                                                      | 2           | Resist.              | MMF                           | Durable (resolved)   |                                |                      |
| 23     | Renal Cell Carcinoma           | 53  | F   | F            | 1                   | None          | N              | Nivolumab, Ipilimumab |                                                      | 3           | Resist.              | Inflix.                       | Transient            |                                | Pneumonitis          |
| 24     | Laryngeal squamous cell cancer | 72  | M   | F            | 2                   | None          | Y              | Pembrolizumab         | Interstitial pneumonia, acute lung injury, Org. Pna. | 3           | Resist.              | Adalimumab                    | Transient            |                                | Pneumonitis          |
| 25     | Sarcoma                        | 62  | M   | F            | 2                   | PE            | Y              | Pembrolizumab         |                                                      | 3           | Resist.              | Inflix.                       | Transient            |                                | Stroke vs neuro IRAE |
| 26     | NSCLC                          | 63  | M   | F            | 2                   | None          | Y              | Nivolumab             | Org. Pna., AFOP                                      | 3           | Resist.              | Inflix., Cyclop.              | Transient            | Infection                      | Infection            |

Pt. No=patient number; smok. status=smoking status; Refr.=steroid refractory; Resist.=steroid resistant; inflix.=infliximab; POD=progression of disease; FTT=failure to thrive; MMF=mycophenolate mofetil; org. pna.=organizing pneumonia; PE=pulmonary embolism; p=pneumonitis; ILD=interstitial lung disease; C-=COPD; DAD=diffuse alveolar damage; AFOP=acute fibrinous and organizing pneumonia
